# Supplementary material for: Identification of Cell Culture Factors Influencing Afucosylation Levels in Monoclonal Antibodies by Partial Least-Squares Regression and Variable Importance Metrics
Source: MDPI journal article supplement (doi:10.3390/pr11010223), 2023-01-10
Supplement: s1 [file s1]

Archive with 1 entries (1 files):
- processes-2101646-supplementary.pdf
