# Supplementary material for: Identification of Cell Culture Factors Influencing Afucosylation Levels in Monoclonal Antibodies by Partial Least-Squares Regression and Variable Importance Metrics
Source: MDPI journal article supplement (doi:10.3390/pr11010223), 2023-01-10
Supplement: s1 [file s1 › processes-2101646-supplementary.pdf]

## Supplementary Material

# Identification of Cell Culture Factors Influencing Afucosylation Levels in Monoclonal Antibodies by Partial Least-Squares Regression and Variable Importance Metrics

Adam J. Rish <sup>1,2,†</sup>, Zhuangrong Huang <sup>1,†</sup>, Khandaker Siddiquee <sup>1</sup>, Jianlin Xu <sup>1,\*</sup>, Carl A. Anderson <sup>2,3</sup>, Michael C. Borys <sup>1</sup> and Anurag Khetan <sup>1</sup>

<sup>1</sup> Biologics Development, Global Product Development and Supply, Bristol Myers Squibb, Devens, MA 01434, USA

<sup>2</sup> Graduate School for Pharmaceutical Sciences, Duquesne University, Pittsburgh, PA 15282, USA

<sup>3</sup> Duquesne Center for Pharmaceutical Technology, Duquesne University, Pittsburgh, PA 15282, USA

\* Correspondence: jianlin.xu@bms.com

† These authors contributed equally to this work.

**Table S1.** List of definitions for upstream culture levers considered in the PLSR models.

| INDEPENDENT FACTOR          | DEFINITION                                                                                 | MOLECULES                                                    |
|-----------------------------|--------------------------------------------------------------------------------------------|--------------------------------------------------------------|
| ADDITIVE 1 BOLUS CONC.      | The concentration of the additive 1 bolus addition.                                        | mAb- $\gamma$                                                |
| ADDITIVE 1 BOLUS DAY        | The day of the addition of the additive 1 bolus to the bioreactor.                         | mAb- $\gamma$                                                |
| ADDITIVE 1 FEED             | The concentration of the additive 1 feed.                                                  | mAb- $\gamma$                                                |
| ADDITIVE 2 CONC.            | The concentration of the additive 2 supplementation.                                       | mAb- $\delta$                                                |
| BASAL AMMONIA               | The real concentration of ammonia in the basal media prior to inoculation.                 | mAb- $\gamma$                                                |
| BASAL GLUCOSE CONC.         | The real concentration of glucose in the basal media prior to inoculation.                 | mAb- $\alpha$ , mAb- $\beta$ , mAb- $\gamma$ , mAb- $\delta$ |
| BASAL GLUTAMATE CONC.       | The real concentration of glutamate in the basal media prior to inoculation.               | mAb- $\gamma$                                                |
| BASAL GLUTAMINE CONC.       | The real concentration of glutamine in the basal media prior to inoculation.               | mAb- $\gamma$                                                |
| BASAL NA <sup>+</sup> CONC. | The real concentration of sodium ions in the basal media prior to inoculation.             | mAb- $\gamma$                                                |
| BASAL OSMOLALITY            | The real osmolality of the basal media prior to inoculation.                               | mAb- $\alpha$ , mAb- $\beta$ , mAb- $\gamma$ , mAb- $\delta$ |
| COPPER SUPP. CONC.          | The concentration of the copper sulfate supplementation.                                   | mAb- $\delta$                                                |
| DAILY FEED %                | The percent of the feed added each day.                                                    | mAb- $\alpha$ , mAb- $\beta$ , mAb- $\gamma$                 |
| FEED AMMONIA                | The real concentration of ammonia in the feed media prior to addition to the bioreactor.   | mAb- $\gamma$                                                |
| FEED GLUCOSE CONC.          | The real concentration of glucose in the feed media prior to addition to the bioreactor.   | mAb- $\alpha$ , mAb- $\beta$ , mAb- $\gamma$ , mAb- $\delta$ |
| FEED GLUTAMATE CONC.        | The real concentration of glutamate in the feed media prior to addition to the bioreactor. | mAb- $\gamma$                                                |

|                                     |                                                                                                                                                              |                                                              |
|-------------------------------------|--------------------------------------------------------------------------------------------------------------------------------------------------------------|--------------------------------------------------------------|
| <b>FEED GLUTAMINE CONC.</b>         | The real concentration of glutamine in the feed media prior to addition to the bioreactor.                                                                   | mAb- $\gamma$                                                |
| <b>FEED NA<sup>+</sup> CONC.</b>    | The real concentration of sodium ions in the feed media prior to addition to the bioreactor.                                                                 | mAb- $\gamma$                                                |
| <b>FEED OSMOLALITY</b>              | The real osmolality of the feed media prior to addition to the bioreactor.                                                                                   | mAb- $\alpha$ , mAb- $\beta$ , mAb- $\gamma$ , mAb- $\delta$ |
| <b>FEED PH</b>                      | The real pH of the feed media prior to addition to the bioreactor.                                                                                           | mAb- $\alpha$ , mAb- $\beta$ , mAb- $\gamma$ , mAb- $\delta$ |
| <b>FEED START DAY</b>               | The start day to begin feeding the bioreactor after the initiation of the culture.                                                                           | mAb- $\delta$                                                |
| <b>GLUCOSE SETPOINT</b>             | The midpoint between the glucose action limit and glucose supplement limit.                                                                                  | mAb- $\delta$                                                |
| <b>PH LOWER BOUND</b>               | The lower bound for the pH control range of the bioreactor.                                                                                                  | mAb- $\gamma$                                                |
| <b>PH SETPOINT</b>                  | The target pH at the outset of the bioreactor culture that the pH control range can be defined relative to as $\pm$ pH units.                                | mAb- $\alpha$ , mAb- $\beta$ , mAb- $\gamma$                 |
| <b>PH UPPER BOUND</b>               | The upper bound for the pH control range of the bioreactor.                                                                                                  |                                                              |
| <b>SEEDING DENSITY</b>              | The cell density of the bioreactor culture following inoculation.                                                                                            | mAb- $\alpha$ , mAb- $\beta$ , mAb- $\gamma$ , mAb- $\delta$ |
| <b>TEMPERATURE SETPOINT</b>         | The initial target temperature at the outset of the bioreactor culture.                                                                                      | mAb- $\alpha$ , mAb- $\beta$                                 |
| <b>TEMPERATURE SHIFT DIFFERENCE</b> | The difference between the initial culture temperature setpoint and the new culture temperature setpoint following the application of the temperature shift. | mAb- $\alpha$                                                |

**Table S2.** Summary of the final PLSR model metrics for each of the molecules (Afuc refers to afucosylation, Mann refers to mannose).

| Model ID                      | LVs | R <sup>2</sup> | RMSEC (% afuc) | Relative RMSEC (%) | RMSECV (% afuc) |
|-------------------------------|-----|----------------|----------------|--------------------|-----------------|
| mAb- $\alpha$<br>Total Afuc   | 2   | 0.63           | 0.60           | 9.38               | 0.81            |
| mAb- $\alpha$<br>High Mann    | 2   | 0.72           | 0.53           | 8.20               | 0.70            |
| mAb- $\alpha$<br>Complex Afuc | 2   | 0.79           | 0.46           | 12.56              | 0.66            |
| mAb- $\beta$<br>Total Afuc    | 3   | 0.66           | 0.58           | 8.82               | 0.95            |
| mAb- $\beta$<br>High Mann     | 4   | 0.66           | 0.58           | 8.26               | 1.56            |
| mAb- $\beta$<br>Complex Afuc  | 4   | 0.70           | 0.54           | 12.45              | 1.09            |
| mAb- $\gamma$<br>Total Afuc   | 4   | 0.82           | 0.42           | 4.07               | 0.83            |
| mAb- $\gamma$<br>High Mann    | 4   | 0.84           | 0.40           | 5.15               | 0.83            |
| mAb- $\gamma$                 | 6   | 0.76           | 0.48           | 12.74              | 0.96            |

|               |   |      |      |       |      |
|---------------|---|------|------|-------|------|
| Complex Afuc  |   |      |      |       |      |
| mAb- $\delta$ | 3 | 0.32 | 0.82 | 20.45 | 0.96 |
| Total Afuc    |   |      |      |       |      |
| mAb- $\delta$ | 3 | 0.78 | 0.46 | 17.21 | 0.55 |
| High Mann     |   |      |      |       |      |
| mAb- $\delta$ | 3 | 0.75 | 0.49 | 12.36 | 0.59 |
| Complex Afuc  |   |      |      |       |      |

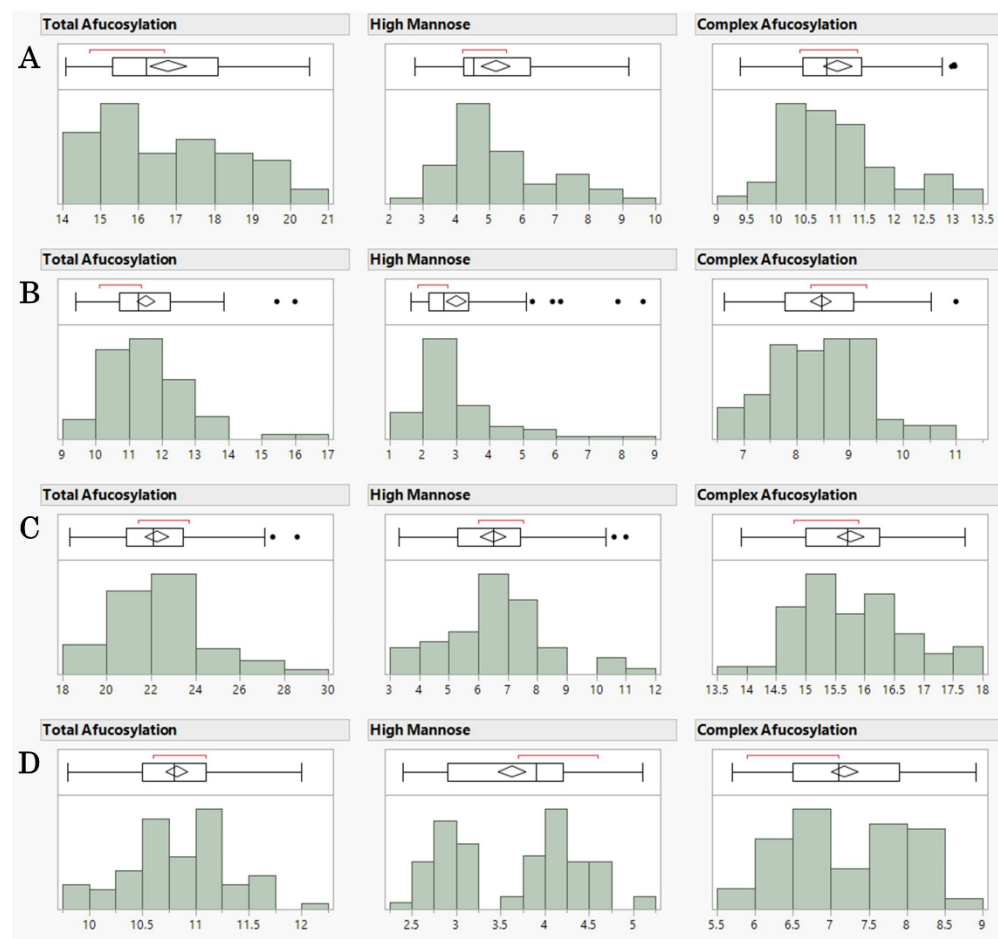

**Figure S1.** Distribution for the different afucosylation categories for the molecules (A) mAb- $\alpha$ , (B) mAb- $\beta$ , (C) mAb- $\gamma$ , and (D) mAb- $\delta$ . All figures were generated from JMP (Version 15.2.0, SAS Institute Inc., Cary, NC).
